# Supplementary material for: Tailored anharmonic–harmonic vibrational profiles for fluorescent biomarkers
Source: Royal Society of Chemistry journal article supplement (doi:10.1039/d2cp01486f), 2022-01-01
Supplement: d2cp01486f1.pdf [file d2cp01486f1.pdf]

# Electronic Supplementary Information to Tailored anharmonic–harmonic vibrational profiles for fluorescent biomarkers

Nghia Nguyen Thi Minh and Carolin König

## S1 *Trans* bithiophene

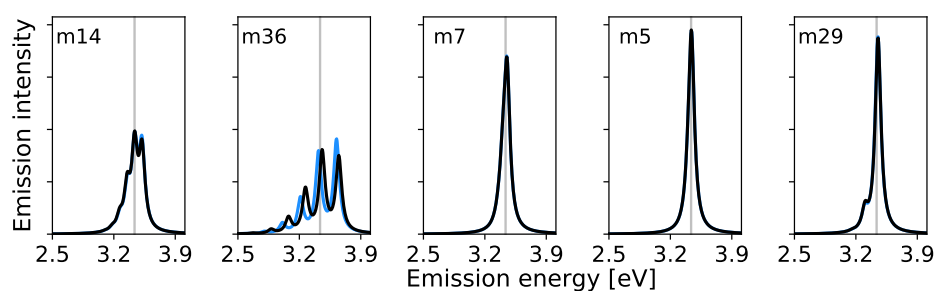

Figure S1: IMDHO-treated (blue) and VCI-treated (black) vibrational profile with a HWHM of  $\gamma = 0.04$  eV for the  $S_0 \leftarrow S_1$  emission for the different modes of *trans* bithiophene employing PESs from ref. [1]. The vertical transition energy is given as a vertical grey line.

## S2 All-*trans* terthiophene

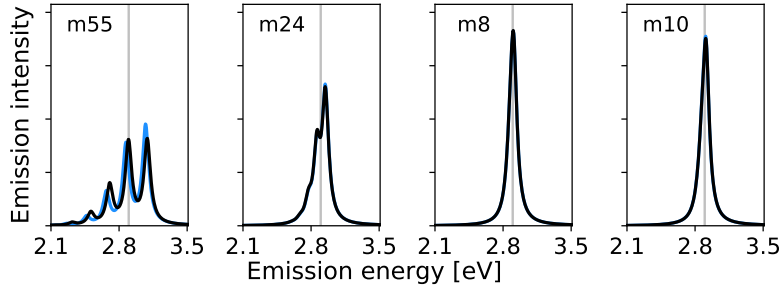

Figure S2: IMDHO-treated (blue) and VCI-treated (black) vibrational profile with a HWHM of  $\gamma = 0.04$  eV for the  $S_0 \leftarrow S_1$  emission for the different modes of all-*trans* terthiophene employing PESs from ref. [1]. The vertical transition energy is given as a vertical grey line.

## S3 All-*trans* quaterthiophene

Table SI: Mode ranking for all-*trans* quaterthiophene using CAM-B3LYP/6-31+g(d). The most important modes with the harmonic frequency  $\nu_i$  in  $\text{cm}^{-1}$ , the absolute value of the harmonic  $|\Delta_i|$  and anharmonic  $|\Delta_i^a|$  dimensionless displacement, the relative difference between harmonic and anharmonic displacement  $\left(\frac{\Delta_i^a}{\Delta_i}\right)^2$ , the resolution measure  $\sigma_i$  in  $\text{cm}^{-1}$ , and the effect of one-mode anharmonicity on the vibronic profile (1-mode AH).

| Mode (i) | $\nu_i/\text{cm}^{-1}$ | $ \Delta_i $ | $ \Delta_i^a $ | $\left(\frac{\Delta_i^a}{\Delta_i}\right)^2$ | $\sigma_i/\text{cm}^{-1}$ | 1-mode AH |
|----------|------------------------|--------------|----------------|----------------------------------------------|---------------------------|-----------|
| 74       | 1616                   | 1.280        | 0.280          | 0.048                                        | 3440                      | moderate  |
| 9        | 162                    | 1.02         | 0.637          | 0.390                                        | 168                       | weak      |
| 32       | 705                    | 0.894        | 1.034          | 1.337                                        | 575                       | weak      |
| 15       | 333                    | 0.693        | 1.439          | 4.315                                        | 187                       | weak      |

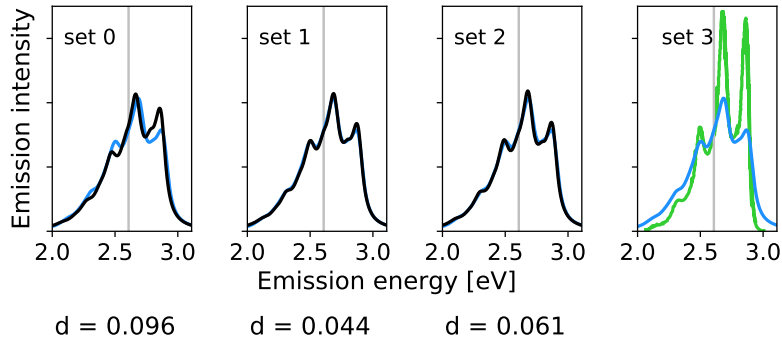

Figure S3: Hybrid VCI-in-IMDHO vibrational profiles for the  $S_0 \leftarrow S_1$  emission for all-*trans* quaterthiophene for the different sets of vibrational coordinates treated by VCI (black) and that for the largest set of modes set 3 (blue) with a HWHM of  $\gamma = 0.04$  eV compared to a corrected experimental spectrum of quaterthiophene at 77 K in ethanol [2] (green). The vertical transition energy is given as a vertical grey line. Within the anharmonic and hybrid models, (set 0) including 0 anharmonic mode; (set 1) including the one with most pronounced one mode anharmonicity: 74; (set 2) including two highest ranked modes: 74, 32 and (set 3) including 4 modes: 74, 9, 32, 15. The experimental spectra is shifted by 0.086 eV to get the same position of maximum as calculated spectrum. Additionally, the deviation between the shown spectra according to eq. (5) in the main text is quantified below the respective graphs.

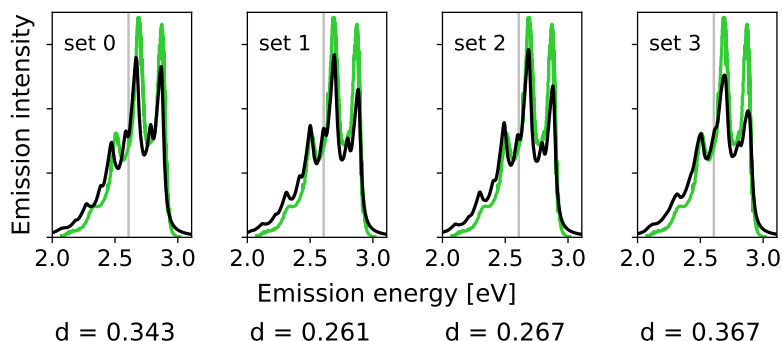

Figure S4: Hybrid VCI-in-IMDHO vibrational profiles for the  $S_0 \leftarrow S_1$  emission for all-*trans* quaterthiophene for the different sets of vibrational coordinates treated by VCI (black) with a HWHM of  $\gamma = 0.02$  eV compared to a corrected experimental spectrum of quaterthiophene at 77 K in ethanol [2] (green). The vertical transition energy is given as a vertical grey line. Within the anharmonic and hybrid models, (set 0) including 0 anharmonic modes; (set 1) including the one with most pronounced one mode anharmonicity: 74; (set 2) including two highest ranked modes: 74, 32 and (set 3) including 4 modes: 74, 9, 32, 15. The experimental spectra is shifted by 0.010 eV to get the same position of maximum as calculated spectrum. Additionally, the deviation between the shown spectra according to eq. (5) in the main text is quantified below the respective graphs.

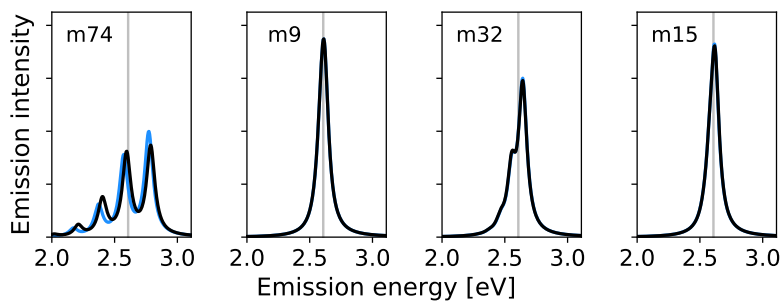

Figure S5: IMDHO treated (blue) and VCI treated (black) vibrational profile with a HWHM of  $\gamma = 0.04$  eV for the  $S_0 \leftarrow S_1$  emission for the different modes of all-*trans* quaterthiophene employing PESs obtained from [1]. The vertical transition energy is given as a vertical grey line.

## S4 All-*trans* pentathiophene

Table SII: Mode ranking for all-*trans* pentathiophene using CAM-B3LYP/6-31+g(d). The most important modes with the harmonic frequency  $\nu_i$  in  $\text{cm}^{-1}$ , the absolute value of the harmonic  $|\Delta_i|$  and anharmonic  $|\Delta_i^a|$  dimensionless displacement, the relative difference between harmonic and anharmonic displacement  $\left(\frac{\Delta_i^a}{\Delta_i}\right)^2$ , the resolution measure  $\sigma_i$  in  $\text{cm}^{-1}$ , and the effect of one-mode anharmonicity on the vibronic profile (1-mode AH).

| Mode | $\nu_i/\text{cm}^{-1}$ | $ \Delta_i $ | $ \Delta_i^a $ | $\left(\frac{\Delta_i^a}{\Delta_i}\right)^2$ | $\sigma_i/\text{cm}^{-1}$ | 1-mode AH |
|------|------------------------|--------------|----------------|----------------------------------------------|---------------------------|-----------|
| 92   | 1600                   | 0.960        | 0.164          | 0.029                                        | 1479                      | weak      |
| 91   | 1592                   | 0.835        | 0.191          | 0.052                                        | 1164                      | weak      |
| 41   | 711                    | 0.795        | 0.989          | 1.549                                        | 483                       | weak      |
| 18   | 323                    | 0.690        | 1.429          | 4.293                                        | 180                       | weak      |

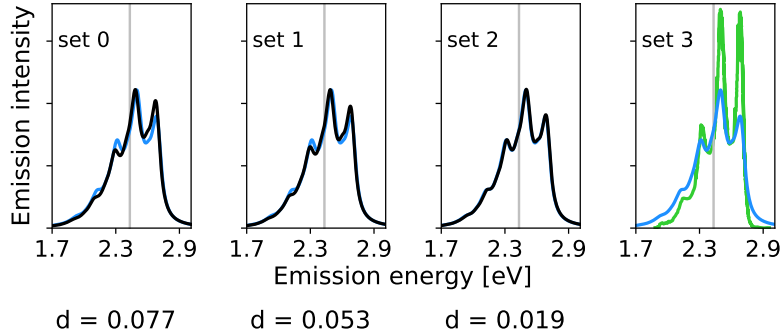

Figure S6: Hybrid VCI-in-IMDHO vibrational profiles for the  $S_0 \leftarrow S_1$  emission for all-*trans* pentathiophene for the different sets of vibrational coordinates treated by VCI (black) and that for the largest set of modes set 3 (blue) with a HWHM of  $\gamma = 0.04$  eV compared to a corrected experimental spectrum of pentathiophene at 77 K in ethanol [2] (green). The vertical transition energy is given as a vertical grey line. Within the anharmonic and hybrid models, (set 0) including 0 anharmonic mode, (set 1) including the highest ranked mode: 92; (set 2) including two anharmonic modes 92, 91 and (set 3) including all important modes: 92, 91, 41, 18. The experiment spectrum is shifted by 0.101 eV to get the same position of maximum as calculated spectrum. Additionally, the deviation between the shown spectra according to eq. (5) in the main text is quantified below the respective graphs.

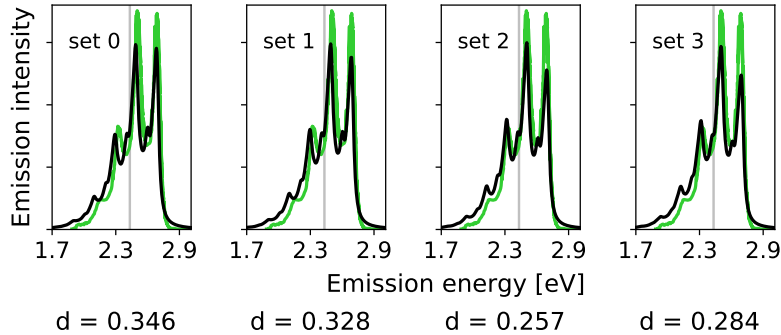

Figure S7: Hybrid VCI-in-IMDHO vibrational profiles for the  $S_0 \leftarrow S_1$  emission for all-*trans* pentathiophene for the different sets of vibrational coordinates treated by VCI (black) with a HWHM of  $\gamma = 0.02$  eV compared to a corrected experimental spectrum of pentathiophene at 77 K in ethanol [2] (green). The vertical transition energy is given as a vertical grey line. Within the anharmonic and hybrid models, (set 0) including 0 anharmonic mode, (set 1) including the highest ranked mode: 92; (set 2) including two anharmonic modes 92, 91 and (set 3) including all important modes: 92, 91, 41, 18. The experiment spectrum is shifted 0.005 eV to get the same position of maximum as calculated spectrum. Additionally, the deviation between the shown spectra according to eq. (5) in the main text is quantified below the respective graphs.

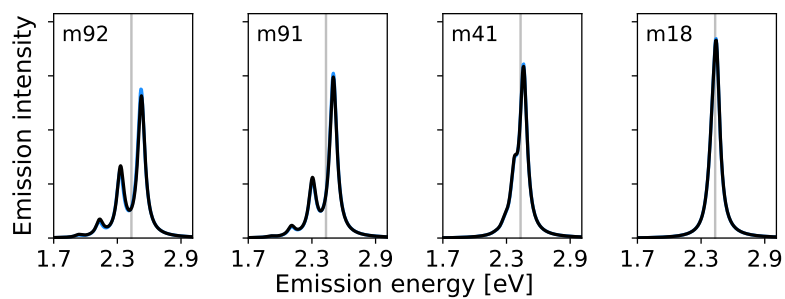

Figure S8: IMDHO treated (blue) and VCI treated (black) vibrational profile with a HWHM of  $\gamma = 0.04$  eV for the  $S_0 \leftarrow S_1$  emission for the different modes of all-*trans* pentathiophene using CAM-B3LYP/def2-TZVP. The vertical transition energy is given as a vertical grey line.

## S5 HS84

Table SIII: Mode ranking for HS84 using CAM-B3LYP/def2-TZVP. The most important modes with the harmonic frequency  $\nu_i$  in  $\text{cm}^{-1}$ , the absolute value of the harmonic  $|\Delta_i|$  and anharmonic  $|\Delta_i^a|$  dimensionless displacement, the relative difference between harmonic and anharmonic displacement  $\left(\frac{\Delta_i^a}{\Delta_i}\right)^2$ , the resolution measure  $\sigma_i$  in  $\text{cm}^{-1}$ , and the effect of one-mode anharmonicity on the vibronic profile (1-mode AH).

| Mode | $\nu_i/\text{cm}^{-1}$ | $ \Delta_i $ | $ \Delta_i^a $ | $\left(\frac{\Delta_i^a}{\Delta_i}\right)^2$ | $\sigma_i/\text{cm}^{-1}$ | 1-mode AH |
|------|------------------------|--------------|----------------|----------------------------------------------|---------------------------|-----------|
| 133  | 1576                   | 1.120        | 0.225          | 0.040                                        | 2044                      | weak      |
| 131  | 1547                   | 0.699        | 0.529          | 0.572                                        | 879                       | weak      |
| 68   | 735                    | 0.697        | 1.584          | 5.166                                        | 416                       | weak      |
| 107  | 1264                   | 0.420        | 0.063          | 0.023                                        | 393                       | weak      |
| 126  | 1488                   | 0.313        | 0.082          | 0.068                                        | 338                       | weak      |

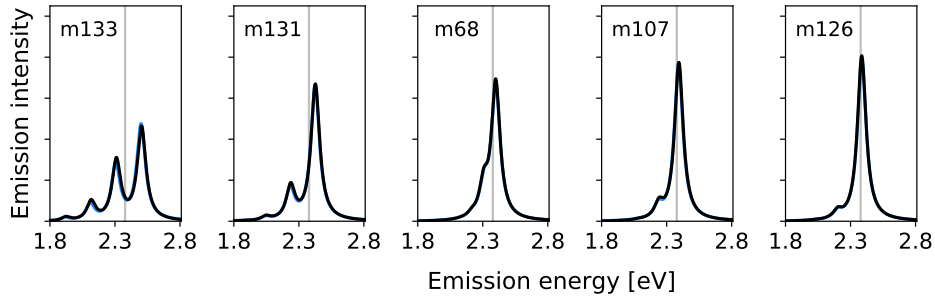

Figure S9: IMDHO treated (blue) and VCI treated (black) vibrational profile with a HWHM of  $\gamma = 0.04$  eV for the  $S_0 \leftarrow S_1$  emission for the different modes of HS84 using CAM-B3LYP/def2-TZVP. The vertical transition energy is given as a vertical grey line.

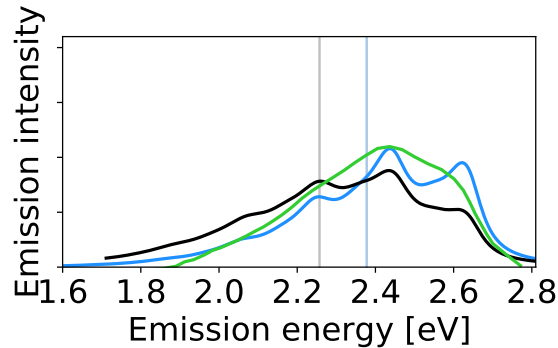

Figure S10: Calculated IMDHO harmonic emission spectra of HS84 in vacuum (blue), in water estimated with the PCM model (black) and a HWHM of  $\gamma = 0.04$  eV using CAM-B3LYP/def2-TZVP compared to a corrected experimental spectrum in PBS[3] (green). The vertical transition energy in vacuum is given as a vertical grey line. The experimental and the IMDHO spectrum in solvent as well as its corresponding excitation energy (vertical blue light line) are shifted by 0.130 eV and 0.211 eV, respectively, to get the same position of maximum as IMDHO harmonic spectra in vacuum. Additionally, the deviation between the calculated spectrum in vacuum and in solvent according to eq. (5) in the main text is 0.211 and 0.343, respectively.

## S6 1,4-diphenylbutadiene

Table SIV: Mode ranking for 1,4-diphenylbutadiene using CAM-B3LYP/def2-TZVP. The most important modes with the harmonic frequency  $\nu_i$  in  $\text{cm}^{-1}$ , the absolute value of the harmonic  $|\Delta_i|$  and anharmonic  $|\Delta_i^a|$  dimensionless displacement, the relative difference between harmonic and anharmonic displacement  $\left(\frac{\Delta_i^a}{\Delta_i}\right)^2$ , the resolution measure  $\sigma_i$  in  $\text{cm}^{-1}$ , and the effect of one-mode anharmonicity on the vibronic profile (1-mode AH).

| Mode | $\nu_i/\text{cm}^{-1}$ | $ \Delta_i $ | $ \Delta_i^a $ | $\left(\frac{\Delta_i^a}{\Delta_i}\right)^2$ | $\sigma_i/\text{cm}^{-1}$ | 1-mode AH |
|------|------------------------|--------------|----------------|----------------------------------------------|---------------------------|-----------|
| 70   | 1691                   | 1.270        | 0.287          | 0.051                                        | 3452                      | moderate  |
| 53   | 1285                   | 0.849        | 0.237          | 0.078                                        | 964                       | weak      |
| 69   | 1653                   | 0.527        | 0.117          | 0.049                                        | 663                       | weak      |
| 41   | 1016                   | 0.372        | 0.141          | 0.144                                        | 277                       | weak      |
| 60   | 1435                   | 0.303        | 0.084          | 0.077                                        | 314                       | weak      |
| 57   | 1363                   | 0.290        | 0.091          | 0.099                                        | 286                       | weak      |
| 64   | 1544                   | 0.202        | 0.053          | 0.069                                        | 223                       | weak      |

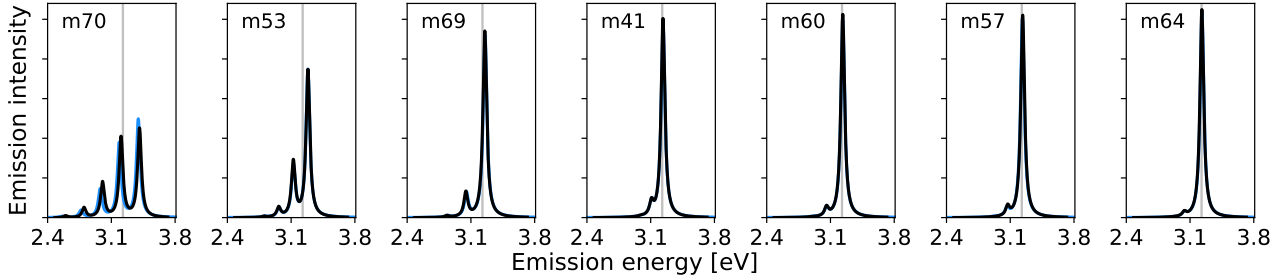

Figure S11: IMDHO treated (blue) and VCI treated (black) vibrational profile with a HWHM of  $\gamma = 0.025$  eV for the  $S_0 \leftarrow S_1$  emission for the different modes of 1,4-diphenylbutadiene using CAM-B3LYP/def2-TZVP. The vertical transition energy is given as a vertical grey line.

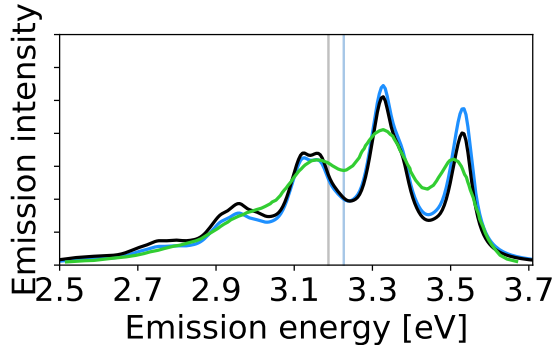

Figure S12: Calculated IMDHO harmonic emission spectra of 1,4-diphenylbutadiene in vacuum (blue), in hexane estimated with the PCM model (black) and a HWHM of  $\gamma = 0.025$  eV using CAM-B3LYP/def2-TZVP compared to a corrected experimental spectrum in hexane[4, 5] (green). The vertical transition energy in vacuum is given as a vertical grey line. The experimental and the IMDHO spectrum in solvent as well as its corresponding excitation energy (vertical blue light line) are shifted by 1.527 eV and 0.196 eV, respectively, to get the same position of maximum as IMDHO harmonic spectra in vacuum. Additionally, the deviation between the calculated spectrum in vacuum and in solvent according to eq. (5) in the main text is 0.289 and 0.253, respectively.

## S7 Anthracene diimide

Table SV: Mode ranking for the anthracene diimide using CAM-B3LYP/def2-TZVP. The most important modes with the harmonic frequency  $\nu_i$  in  $\text{cm}^{-1}$ , the absolute value of the harmonic  $|\Delta_i|$ , anharmonic  $|\Delta_i^a|$  dimensionless displacement, the relative difference between harmonic and anharmonic displacement  $\left(\frac{\Delta_i^a}{\Delta_i}\right)^2$ , the resolution measure  $\sigma_i$  in  $\text{cm}^{-1}$ , and the effect of one-mode anharmonicity on the vibronic profile (1-mode AH).

| Mode | $\nu_i/\text{cm}^{-1}$ | $ \Delta_i $ | $ \Delta_i^a $ | $\left(\frac{\Delta_i^a}{\Delta_i}\right)^2$ | $\sigma_i/\text{cm}^{-1}$ | 1-mode AH |
|------|------------------------|--------------|----------------|----------------------------------------------|---------------------------|-----------|
| 79   | 1447                   | 0.706        | 0.149          | 0.045                                        | 833                       | weak      |
| 75   | 1398                   | 0.642        | 0.133          | 0.043                                        | 712                       | weak      |
| 92   | 1652                   | 0.607        | 0.107          | 0.031                                        | 785                       | weak      |
| 29   | 512                    | 0.566        | 0.336          | 0.350                                        | 223                       | weak      |
| 65   | 1215                   | 0.352        | 0.077          | 0.048                                        | 312                       | weak      |
| 81   | 1473                   | 0.332        | 0.061          | 0.034                                        | 356                       | weak      |
| 88   | 1546                   | 0.318        | 0.059          | 0.035                                        | 367                       | weak      |
| 89   | 1574                   | 0.252        | 0.045          | 0.032                                        | 285                       | weak      |
| 82   | 1502                   | 0.227        | 0.039          | 0.030                                        | 244                       | weak      |

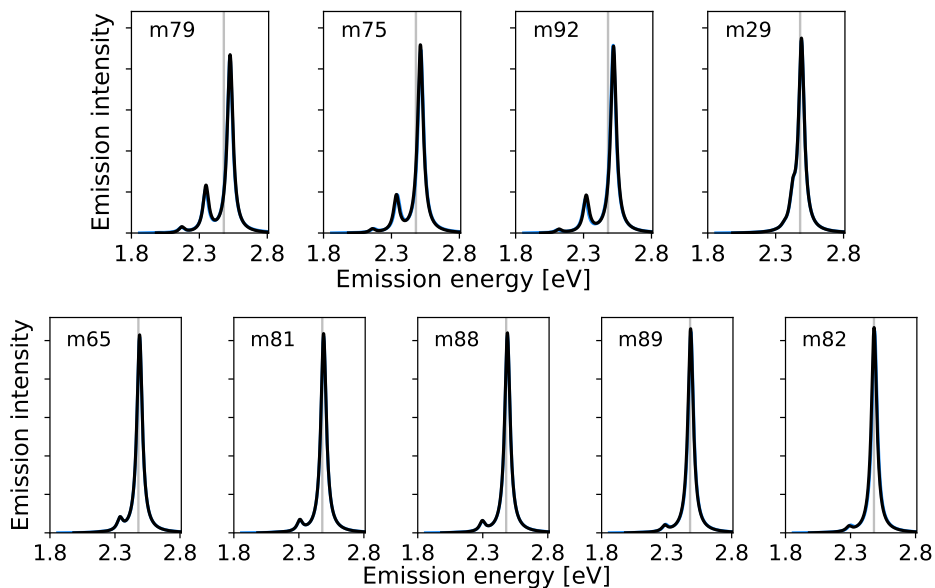

Figure S13: IMDHO treated (blue) and VCI treated (black) vibrational profile with a HWHM of  $\gamma = 0.025$  eV for the  $S_0 \leftarrow S_1$  emission for the different modes of anthracene diimide using CAM-B3LYP/def2-TZVP. The vertical transition energy is given as a vertical grey line.



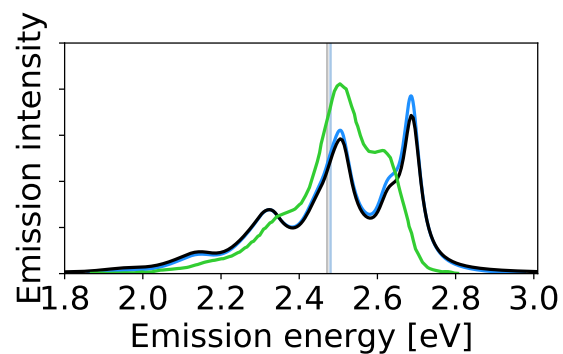

Figure S14: Calculated IMDHO harmonic emission spectra of anthracene diimide in vacuum (blue), in dichloromethane estimated with the PCM model (black) and a HWHM of  $\gamma = 0.025$  eV using CAM-B3LYP/def2-TZVP compared to a corrected experimental spectrum in dichloromethane[6, 7] (green). The vertical transition energy in vacuum is given as a vertical grey line. The experimental and the IMDHO spectrum in solvent as well as its corresponding excitation energy (vertical blue light line) are shifted by 1.121 eV and 0.169 eV, respectively, to get the same position of maximum as IMDHO harmonic spectra in vacuum. Additionally, the deviation between the calculated spectrum in vacuum and in solvent according to eq. (5) in the main text is 0.489 and 0.522, respectively.

## References

- [1] D. Madsen, O. Christiansen, P. Norman and C. König, Phys. Chem. Chem. Phys., 2019, **21**, 17410–17422.
- [2] R. S. Becker, J. Seixas De Melo, A. L. Maçanita and F. Elisei, J. Phys. Chem., 1996, **100**, 18683–18695.
- [3] H. Shirani, M. Linares, C. J. Sigurdson, M. Lindgren, P. Norman and K. P. R. Nilsson, Chem. - A Eur. J., 2015, **21**, 15133–15137.
- [4] A. Charaf-Eddin, A. Planchat, B. Mennucci, C. Adamo and D. Jacquemin, J. Chem. Theory Comput., 2013, **9**, 2749–2760.
- [5] H. Du, R.-C. A. Fuh, J. Li, L. A. Corkan and J. S. Lindsey, Photochem. Photobiol., 1998, **68**, 141–142.
- [6] Y. Houari, A. D. Laurent and D. Jacquemin, J. Phys. Chem. C, 2013, **117**, 21682–21691.
- [7] A. R. Mohebbi, C. Munoz and F. Wudl, Org. Lett., 2011, **13**, 2560–2563.
